# Supplementary material for: Potential cross-species correlations in social hierarchy and memory between mice and young children
Source: PubMed Central journal article supplement (PMC8921227; doi:10.1038/s42003-022-03173-7), 2022-03-14
Supplement: 42003_2022_3173_MOESM2_ESM.pdf [file 42003_2022_3173_MOESM2_ESM.pdf]

1 **Supplementary Figure 1**

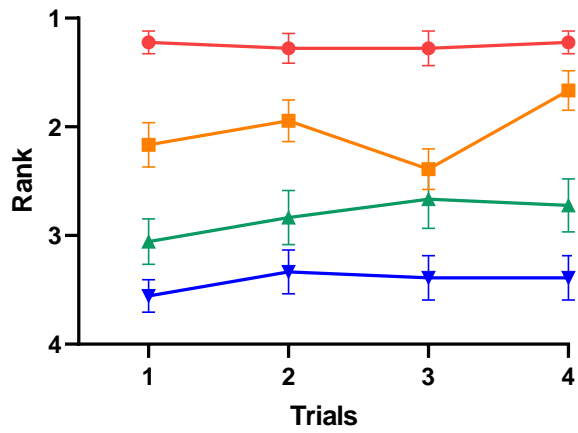

2

3 **Supplementary Figure 1. Summary of social ranks.** Summary of the social ranks of the weanling  
4 mice as determined by the tube test over four trials (n = 14 cages). Error bars = SEM.

5

6 **Supplementary Figure 2**

7

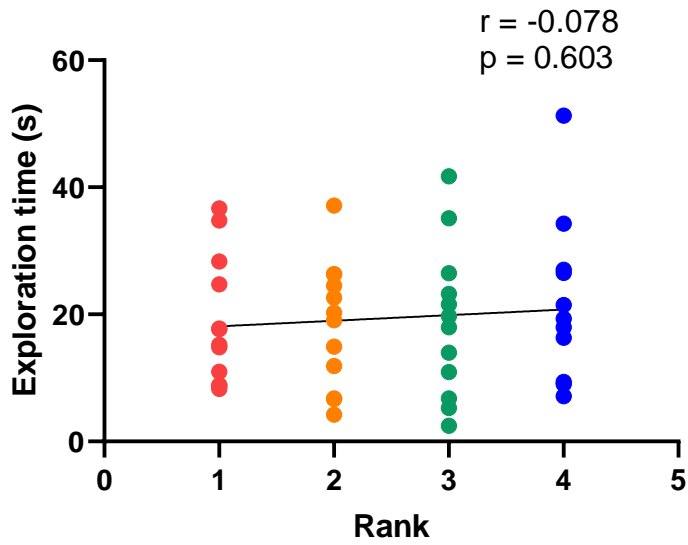

8

9 **Supplementary Figure 2. There was no significant correlation between social rank and**  
10 **exploratory behavior.** The correlation between rank and exploration time in the novelty investigation  
11 test (Spearman correlation,  $n = 12$  cages).

12

13 **Supplementary Figure 3**

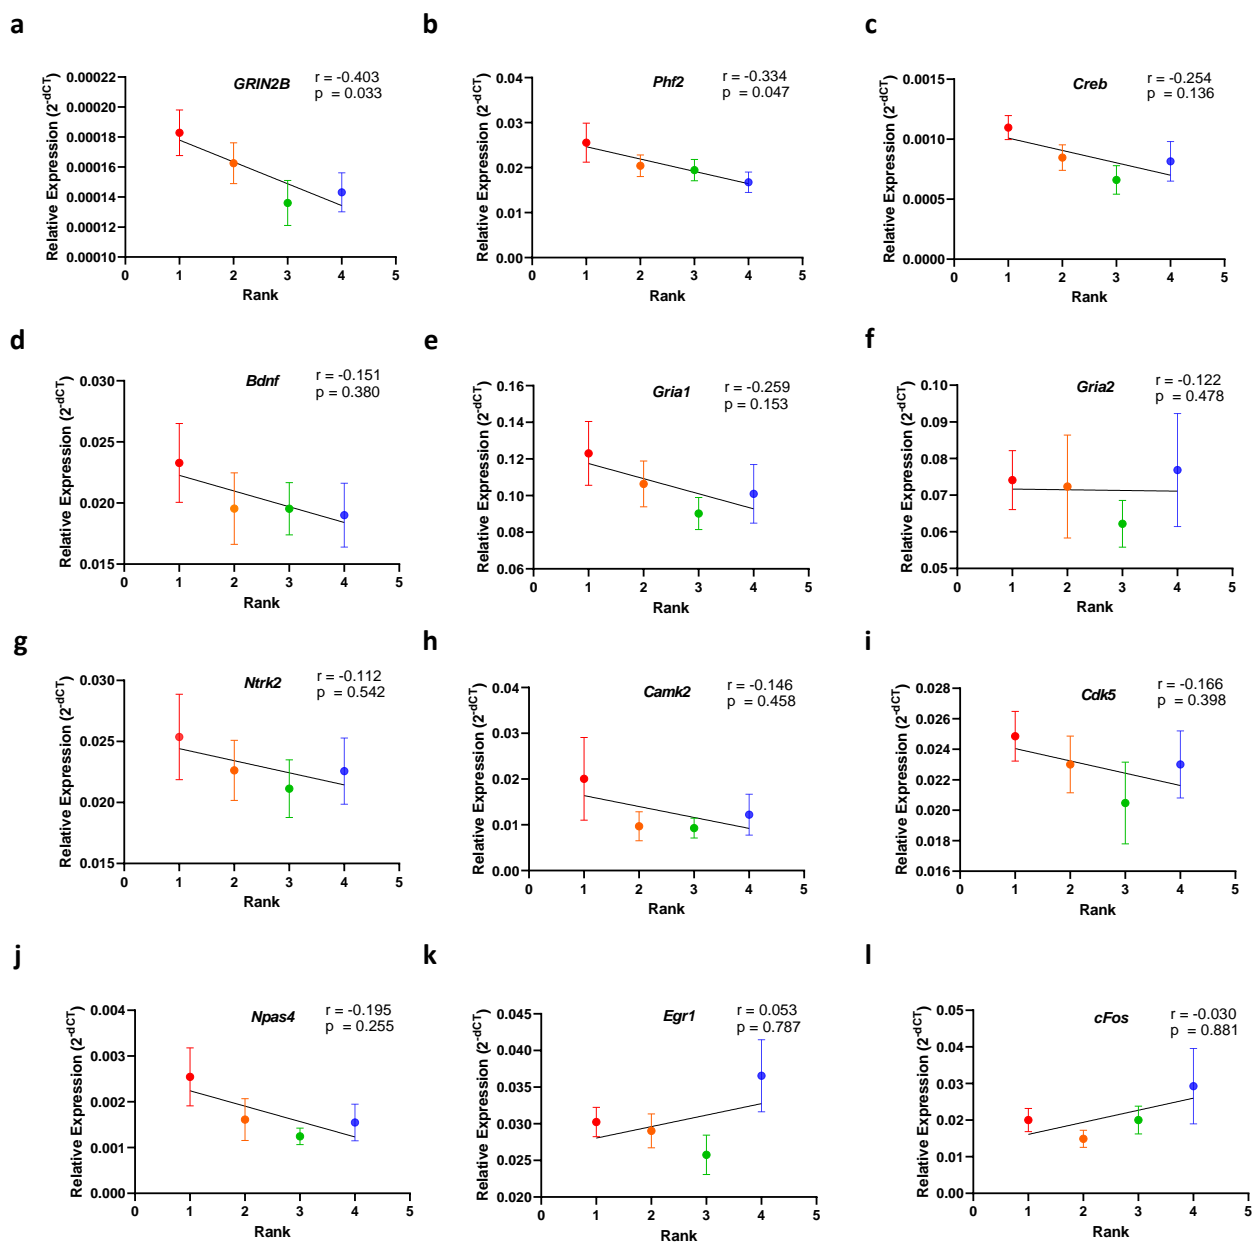

14

15

16 **Supplementary Figure 3. Dominant weanling mice tended to have a higher expression of several**  
17 **memory-related genes than subordinate weanling mice. a** The correlation between social rank and  
18 *Grin2b* expression (n = 7 cages). **b** The correlation between social rank and *Phf2* expression (n = 9  
19 cages). **c** The correlation between social rank and *Creb* expression (n = 9 cages). **d** The correlation  
20 between social rank and *Bdnf* expression (n = 9 cages). **e** The correlation between social rank and  
21 *Gria1* expression (n = 8 cages). **f** The correlation between social rank and *Gria2* expression (n = 9  
22 cages). **g** The correlation between social rank and *Ntrk2* expression (n = 8 cages). **h** The correlation  
23 between social rank and *Camk2* expression (n = 7 cages). **i** The correlation between social rank and  
24 *Cdk5* expression (n = 7 cages). **j** The correlation between social rank and *Npas4* expression (n = 9  
25 cages). **k** The correlation between social rank and *Egr1* expression (n = 7 cages). **l** The correlation  
26 between social rank and *cFos* expression (n = 7 cages). Spearman correlation. Error bars = SEM.

27

28

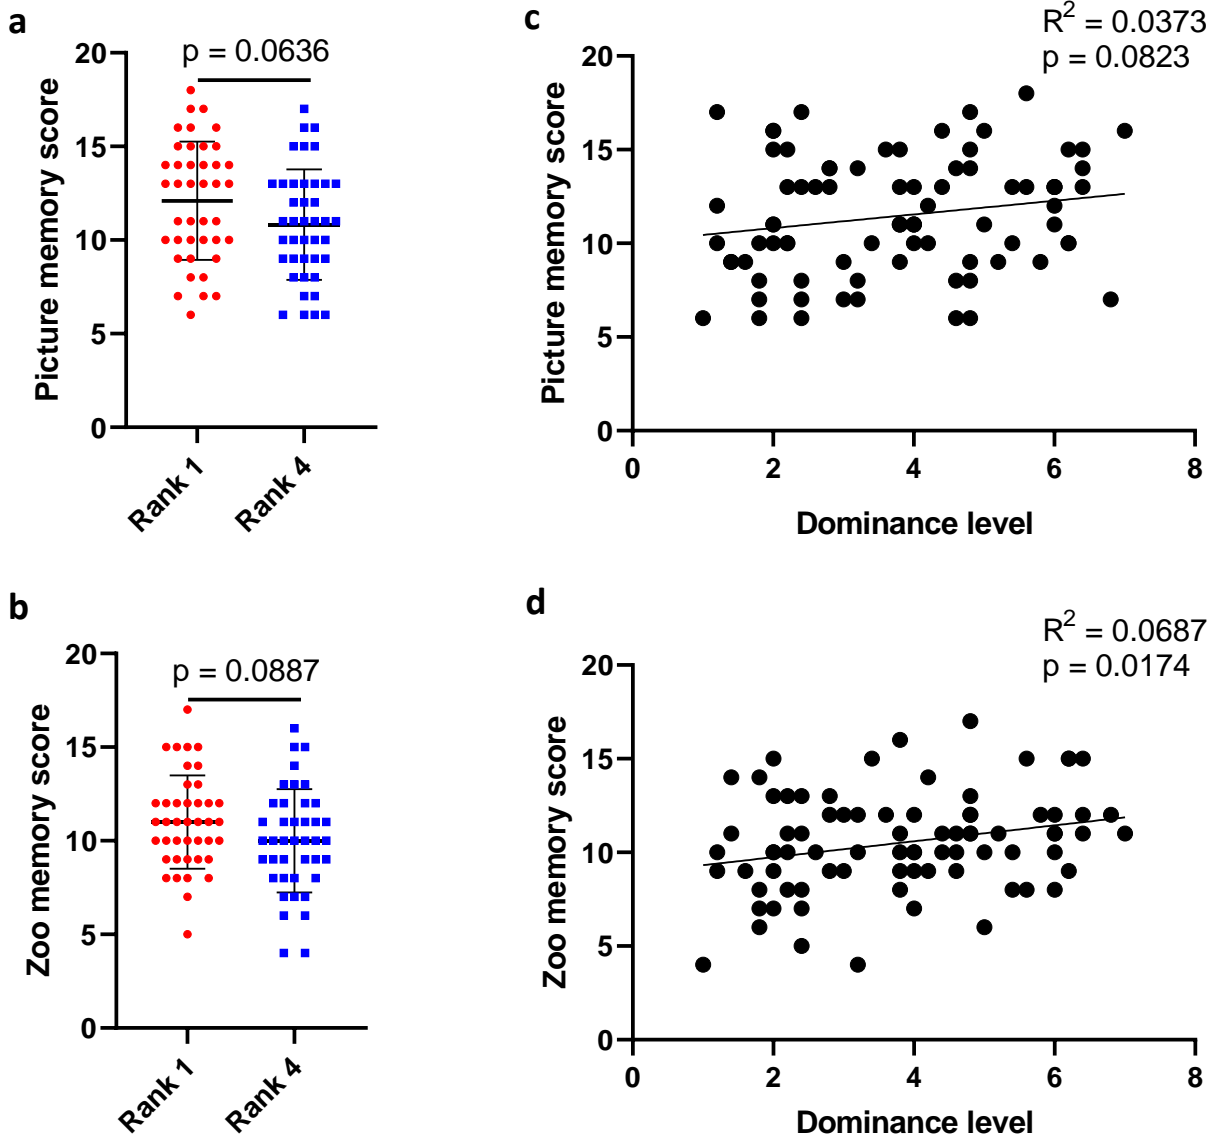

30

31

32 **Supplementary Figure 4. Children with higher rank or dominance levels tended to better**  
33 **memory. a** The picture memory test scores for 1<sup>st</sup>- and 4<sup>th</sup>-rank children (unpaired t test,  $n = 82$  pairs).

34 **b** The zoo memory test scores for 1<sup>st</sup>- and 4<sup>th</sup>-rank children (unpaired t test,  $n = 82$ ).

35 **c** The correlation between picture memory scores and dominance levels (Pearson correlation,  $n = 82$ ).

36 **d** The correlation between zoo memory scores and dominance levels (Pearson correlation,  $n = 82$ ). Error bars = SEM.

37

38 **Supplementary Table 1. The consistency between social rank and expression level of memory-**  
 39 **related genes**

| Gene           | Rank Pairing |        |        |        |        |        | Mean   | Z score | P value |
|----------------|--------------|--------|--------|--------|--------|--------|--------|---------|---------|
|                | 1:4          | 1:3    | 2:4    | 1:2    | 2:3    | 3:4    |        |         |         |
| <i>Phf2</i>    | 100.000      | 77.778 | 77.778 | 77.778 | 55.556 | 77.778 | 77.778 | 4.910   | <0.001  |
| <i>Creb</i>    | 66.667       | 88.889 | 66.667 | 66.667 | 66.667 | 33.333 | 69.048 | 2.280   | 0.023   |
| <i>Grin2b</i>  | 71.429       | 71.429 | 71.429 | 57.143 | 71.429 | 57.143 | 66.667 | 2.291   | 0.022   |
| <i>Gria1</i>   | 62.500       | 75.000 | 62.500 | 75.000 | 75.000 | 37.500 | 64.583 | 2.113   | 0.035   |
| <i>CamkIIa</i> | 71.429       | 57.143 | 42.857 | 85.714 | 71.429 | 57.143 | 64.286 | 1.932   | 0.053   |
| <i>Gria2</i>   | 66.667       | 77.778 | 55.556 | 55.556 | 66.667 | 44.444 | 61.905 | 1.675   | 0.094   |
| <i>Bdnf</i>    | 55.556       | 77.778 | 44.444 | 66.667 | 44.444 | 55.556 | 61.905 | 1.101   | 0.271   |
| <i>Npas</i>    | 55.556       | 55.556 | 44.444 | 55.556 | 44.444 | 44.444 | 57.143 | 0.000   | >0.999  |
| <i>Cdk5</i>    | 71.429       | 71.429 | 42.857 | 57.143 | 42.857 | 28.571 | 52.381 | 0.309   | 0.758   |
| <i>Egr1</i>    | 28.571       | 57.143 | 14.286 | 42.857 | 57.143 | 28.571 | 45.238 | -1.589  | 0.112   |
| <i>Trkb</i>    | 50.000       | 75.000 | 25.000 | 37.500 | 62.500 | 37.500 | 45.238 | -0.289  | 0.773   |
| <i>Cfos</i>    | 57.143       | 57.143 | 42.857 | 57.143 | 14.286 | 42.857 | 38.095 | -0.620  | 0.535   |

40 *Note. The values indicate the percentage of higher rank mice with higher gene expression than lower*  
 41 *rank mice.*

42  
43  
44

45 **Supplementary Table 2. Regression analysis of the mediation effect:**  
 46 **children memory→prosocial strategy→social dominance (n=175)**

|                             | <u>Prosocial strategy</u> | <u>Social dominance</u> |                |                |
|-----------------------------|---------------------------|-------------------------|----------------|----------------|
|                             | <u>Model 1</u>            | <u>Model 2</u>          | <u>Model 3</u> | <u>Model 4</u> |
|                             | $\beta$                   | $\beta$                 | $\beta$        | $\beta$        |
| <b>Memory ability</b>       | 0.46***                   | 0.52***                 |                | 0.33***        |
| <b>Prosocial strategy</b>   |                           |                         | 0.56***        | 0.40***        |
| <b><math>R^2</math></b>     | 0.21                      | 0.27                    | 0.31           | 0.39           |
| <b>Adj <math>R^2</math></b> | 0.20                      | 0.26                    | 0.30           | 0.39           |
| <b><math>F</math></b>       | 45.09***                  | 62.29***                | 76.82***       | 55.99***       |
| <b><math>df</math></b>      | 1.173                     | 1.173                   | 1.173          | 2.172          |

47 \*\*\* $p < 0.001$ .

48

49 **Supplementary Table 3. Two-way ANOVA of FN400 by social status (1<sup>st</sup>- and 4<sup>th</sup>-rank children)**  
 50 **and social facial expression**

| Source of variance                        | <i>SS</i> | <i>df</i> | <i>MS</i> | <i>F</i> | <i>p</i> | $\eta^2_p$ |
|-------------------------------------------|-----------|-----------|-----------|----------|----------|------------|
| <b>Social status (between)</b>            | 81.537    | 1         | 81.537    | 6.415*   | 0.019    | 0.226      |
| <b>Error (between)</b>                    | 279.626   | 22        | 12.710    |          |          |            |
| <b>Social facial expression (within)</b>  | 18.426    | 1         | 18.426    | 5.649*   | 0.027    | 0.204      |
| <b>Social rank* social dominance face</b> | 50.266    | 1         | 50.266    | 15.411** | 0.001    | 0.412      |
| <b>Error (within)</b>                     | 71.760    | 22        | 3.262     |          |          |            |

51 \*  $p < 0.05$ , \*\* $p < 0.01$ . Note. The FN400 amplitudes of each facial expression were corrected by  
 52 subtracting the averaged amplitude of the neutral facial condition.

53

54

55

56 **Supplementary Table 4. FN400 comparisons between 1<sup>st</sup>- and 4<sup>th</sup>-rank children when they were**  
 57 **evaluating**  
 58 **different social facial expressions**

| Social status            | Face             | <i>Mean</i> | <i>SD</i> | <i>t</i> | <i>df</i> | <i>p</i> | <i>Effect size (d)</i> |
|--------------------------|------------------|-------------|-----------|----------|-----------|----------|------------------------|
| <b>Rank 1 vs. rank 4</b> | <b>DF</b>        | 4.653       | 1.145     | 4.065**  | 22        | 0.001    | 1.659                  |
| <b>Rank 1 vs. rank 4</b> | <b>SF</b>        | 0.560       | 1.163     | 0.482    | 22        | 0.635    | 0.197                  |
| <b>Rank 1</b>            | <b>DF vs. SF</b> | -3.286      | 2.480     | -4.589** | 11        | 0.001    | 1.223                  |
| <b>Rank 4</b>            | <b>DF vs. SF</b> | 0.808       | 2.626     | 1.065    | 11        | 0.310    | 0.273                  |

59 \*\* $p < 0.01$ . Note. DF = dominant face, SF = subordinate face. The amplitudes of FN400 were corrected  
 60 by subtracting the averaged amplitude of the neutral facial condition.

61

62 **Supplementary Table 5. Primer used for quantitative PCR**

| Gene          | Forward primer (5'-3')                   | Reverse primer (5'-3')                             |
|---------------|------------------------------------------|----------------------------------------------------|
| <i>Bdnf</i>   | <i>GGCTGACACTTTTGAGCACGTC</i>            | <i>CTCCAAAGGCACTTGACTGCTG</i>                      |
| <i>Camk2</i>  | <i>ACCCTGGCCTGGTCCTTCAATG</i>            | <i>AGCCATCCTCACCACCTATGCTGG</i>                    |
| <i>Cdk5</i>   | <i>GGCTAAAAACCGGGAAACTC</i>              | <i>CCATTGCAGCTGTGCGAAATA</i>                       |
| <i>Creb</i>   | <i>TCAGGGTACTACCATTC</i>                 | <i>TTCAGCAGGCTGTGTAGGAA</i>                        |
| <i>C-fos</i>  | <i>TTCCTGGCAATAGCGTGTTTC</i>             | <i>TTCAGACCACCTCGACAATG</i>                        |
| <i>Egr1</i>   | <i>CGAGCGAACAACCCTATGAG</i>              | <i>CATTATTCAGAGCGATGTCAGAAA</i>                    |
| <i>Gria1</i>  | <i>TTTTCTAGGTGCGGTTGTGG</i>              | <i>CCT TTGGAGAACTGGGAACA</i>                       |
| <i>Gria2</i>  | <i>AAGGAGGAAAGGGAAACGAG</i>              | <i>CCGAAGTGGAAAACCTGAACC</i>                       |
| <i>Npas4</i>  | <i>GCTATACTCAGAAGGTCCAGAAGGC</i>         | <i>TCAGAGAATGAGGGTAGCACAGC</i>                     |
| <i>GRIN2B</i> | <i>TCTGCCTTCTTAGAGCCATTCAG</i>           | <i>AGACAGCTACAGCAGAGAC</i>                         |
| <i>Phf2</i>   | <i>TGCCCCGAACTGCGAGAAAACCC</i>           | <i>TTTCACGTCCGGTGTTGGCCC</i>                       |
| <i>Ntrk2</i>  | <i>GTGGTGTCATTAGTAGGTTCTTTGTT<br/>TT</i> | <i>ACTGAACCTGACCGTACAGAGTT<br/>TGGGTCTTTGCTGCC</i> |
| <i>Gapdh</i>  | <i>GGCAAATTCAACGGCACAGT</i>              | <i>GGGTCTCGCTCCTGGAAGAT</i>                        |

63
